# Supplementary material
Source: MDPI journal article supplement (https://www.mdpi.com/2077-0472/13/10/1882)
Supplement: s1 [file s1]

Table S3: All the identified MTAs for grain size and shape-related traits in durum panel. Stable MTAs marked by asterisk

| Trait | Environment | MTA                 | SNP-ID               | Chr. | Position    | P value <sup>1</sup> | MAF  | Add. Eff. <sup>2</sup> |
|-------|-------------|---------------------|----------------------|------|-------------|----------------------|------|------------------------|
| AS    | E2/BLUP     | <i>QAS.su.2A1*</i>  | <i>SNP-1095449</i>   | 2A   | 104,655,222 | 1.02E-12             | 0.33 | -0.76                  |
|       | E2          | <i>QAS.su.2A2</i>   | <i>SNP-991434</i>    | 2A   | 531,237,720 | 3.60E-16             | 0.39 | -1.04                  |
|       | BLUP        | <i>QAS.su.2A3</i>   | <i>SNP-1127014</i>   | 2A   | 501,916,772 | 6.96E-09             | 0.38 | -0.49                  |
|       | BLUP        | <i>QAS.su.2A4</i>   | <i>SNP-1071334</i>   | 2A   | 723,735,918 | 1.14E-06             | 0.24 | -0.35                  |
|       | E1          | <i>QAS.su.4A1</i>   | <i>SNP-1017888</i>   | 4A   | 584,706,382 | 4.04E-06             | 0.04 | 1.30                   |
|       | E1          | <i>QAS.su.6A1</i>   | <i>SNP-1006957</i>   | 6A   | 451,640,237 | 2.38E-10             | 0.16 | 0.93                   |
|       | E1          | <i>QAS.su.7B1</i>   | <i>SNP-2293044</i>   | 7B   | 634,388,110 | 5.42E-06             | 0.20 | 0.57                   |
|       | E2          | <i>QAS.su.7B2</i>   | <i>SNP-1091721</i>   | 7B   | 716,307,209 | 1.62E-09             | 0.09 | -1.55                  |
|       | BLUP        | <i>QAS.su.7B3</i>   | <i>SNP-1127813</i>   | 7B   | 500,368,572 | 9.49E-06             | 0.42 | 0.28                   |
| PL    | E1/E2/BLUP  | <i>QPL.su.1B1*</i>  | <i>SNP-100083695</i> | 1B   | 29,327,461  | 3.37E-09             | 0.20 | 0.40                   |
|       | E1          | <i>QPL.su.2A1</i>   | <i>SNP-1102402</i>   | 2A   | 120,126,537 | 2.68E-08             | 0.35 | 0.35                   |
|       | E2          | <i>QPL.su.2A2</i>   | <i>SNP-991434</i>    | 2A   | 531,237,720 | 1.19E-14             | 0.39 | -0.49                  |
|       | BLUP        | <i>QPL.su.2A3</i>   | <i>SNP-1095449</i>   | 2A   | 104,655,222 | 1.54E-08             | 0.33 | 0.28                   |
|       | BLUP        | <i>QPL.su.2A4</i>   | <i>SNP-1127014</i>   | 2A   | 501,916,772 | 9.02E-06             | 0.38 | -0.23                  |
|       | E2          | <i>QPL.su.5A1</i>   | <i>SNP-10983760</i>  | 5A   | 509,939,168 | 3.51E-06             | 0.17 | 0.30                   |
|       | E1          | <i>QPL.su.6A1</i>   | <i>SNP-1006957</i>   | 6A   | 451,640,237 | 1.63E-08             | 0.16 | -0.45                  |
|       | E2          | <i>QPL.su.7A1</i>   | <i>SNP-1125288</i>   | 7A   | 56,088,430  | 7.70E-08             | 0.13 | -0.40                  |
|       | E2          | <i>QPL.su.7B1</i>   | <i>SNP-1091721</i>   | 7B   | 716,307,209 | 7.26E-06             | 0.09 | -0.60                  |
| L     | E1/E2/BLUP  | <i>QL.su.1B1*</i>   | <i>SNP-100083695</i> | 1B   | 29,327,461  | 1.53E-11             | 0.20 | 0.22                   |
|       | E1          | <i>QL.su.2A1</i>    | <i>SNP-991737</i>    | 2A   | 505,958,255 | 4.74E-10             | 0.36 | -0.18                  |
|       | E2          | <i>QL.su.2A2</i>    | <i>SNP-991434</i>    | 2A   | 531,237,720 | 4.32E-17             | 0.40 | -0.22                  |
|       | BLUP        | <i>QL.su.2A3</i>    | <i>SNP-1095449</i>   | 2A   | 104,655,222 | 1.54E-08             | 0.33 | -0.28                  |
|       | BLUP        | <i>QL.su.2A4</i>    | <i>SNP-1127014</i>   | 2A   | 501,916,772 | 9.02E-06             | 0.38 | -0.23                  |
|       | E2          | <i>QL.su.5A1</i>    | <i>SNP-10983760</i>  | 5A   | 509,939,168 | 1.73E-07             | 0.18 | 0.15                   |
|       | E1          | <i>QL.su.6A1</i>    | <i>SNP-1006957</i>   | 6A   | 451,640,237 | 4.23E-08             | 0.17 | -0.19                  |
|       | E2          | <i>QL.su.6B1</i>    | <i>SNP-1091395</i>   | 6B   | 653,235,473 | 1.47E-09             | 0.05 | 0.30                   |
| LWR   | E1/BLUP     | <i>QLWR.su.2A1*</i> | <i>SNP-1150369</i>   | 2A   | 148,130,749 | 6.62E-09             | 0.28 | 0.05                   |
|       | E1/BLUP     | <i>QLWR.su.2A2*</i> | <i>SNP-991737</i>    | 2A   | 505,958,255 | 1.09E-08             | 0.36 | -0.05                  |
|       | BLUP        | <i>QLWR.su.3A1</i>  | <i>SNP-1127543</i>   | 3A   | 47,156,933  | 1.85E-07             | 0.28 | -0.03                  |
| CS    | E1/BLUP     | <i>QCS.su.2A1*</i>  | <i>SNP-1150369</i>   | 2A   | 148,130,749 | 8.48E-10             | 0.28 | -0.01                  |
|       | E1/BLUP     | <i>QCS.su.2A2*</i>  | <i>SNP-991737</i>    | 2A   | 505,958,255 | 2.88E-09             | 0.36 | -0.01                  |
|       | BLUP        | <i>QCS.su.2A3</i>   | <i>SNP-1725042</i>   | 2A   | 724,616,734 | 1.21E-05             | 0.21 | -0.01                  |
|       | BLUP        | <i>QCS.su.3A1</i>   | <i>SNP-1127543</i>   | 3A   | 47,156,933  | 9.14E-06             | 0.28 | 0.01                   |
|       | E1/BLUP     | <i>QCS.su.7A1*</i>  | <i>SNP-1059714</i>   | 7A   | 673,131,697 | 1.94E-08             | 0.41 | -0.01                  |
| TGW   | E2          | <i>QTGW.su.1A1</i>  | <i>SNP-1209291</i>   | 1A   | 527,910,602 | 7.27E-06             | 0.18 | -2.43                  |
|       | E1          | <i>QTGW.su.2A1</i>  | <i>SNP-1041769</i>   | 2A   | 127,602,655 | 7.28E-09             | 0.38 | -2.75                  |
|       | E2/BLUP     | <i>QTGW.su.2A2*</i> | <i>SNP-3025548</i>   | 2A   | 106,204,569 | 2.35E-09             | 0.33 | -2.90                  |
|       | E1/E2/BLUP  | <i>QTGW.su.2A3*</i> | <i>SNP-991434</i>    | 2A   | 531,237,720 | 3.17E-17             | 0.40 | -4.24                  |
|       | E2          | <i>QTGW.su.2A4</i>  | <i>SNP-2256686</i>   | 2A   | 726,762,051 | 3.39E-06             | 0.11 | 2.87                   |
|       | E2          | <i>QTGW.su.5B1</i>  | <i>SNP-992710</i>    | 5B   | 243,670,953 | 1.49E-06             | 0.14 | -2.94                  |
|       | E1/E2/BLUP  | <i>QTGW.su.7B1*</i> | <i>SNP-5369680</i>   | 7B   | 500,369,002 | 2.48E-08             | 0.45 | -2.12                  |

<sup>1</sup>: The highest p value over environments, <sup>2</sup>: Additive effects of the significant MTAs on the related traits
