# Supplementary material
Source: MDPI journal article supplement (https://www.mdpi.com/2077-0472/13/10/1882)
Supplement: s1 [file s1]

Table S2. Pearson's correlation coefficient of grain size and shape-related traits in the durum panel in two environments and the BLUP data

| Traits |    |     | E1        | E2        | BLUP      |
|--------|----|-----|-----------|-----------|-----------|
| AS     | vs | PL  | 0.890***  | 0.940***  | 0.927***  |
| AS     | vs | L   | 0.783***  | 0.875***  | 0.856***  |
| AS     | vs | W   | 0.701***  | 0.710***  | 0.614***  |
| AS     | vs | LWR | 0.046     | 0.311***  | 0.323***  |
| AS     | vs | CS  | -0.041    | -0.256**  | -0.304*** |
| AS     | vs | TGW | 0.656***  | 0.836***  | 0.108     |
| PL     | vs | L   | 0.975***  | 0.982***  | 0.983***  |
| PL     | vs | W   | 0.314***  | 0.451***  | 0.288***  |
| PL     | vs | LWR | 0.486***  | 0.604***  | 0.647***  |
| PL     | vs | CS  | -0.487*** | -0.564*** | -0.634*** |
| PL     | vs | TGW | 0.507***  | 0.726***  | 0.059     |
| L      | vs | W   | 0.128     | 0.312***  | 0.141     |
| L      | vs | LWR | 0.645***  | 0.721***  | 0.757***  |
| L      | vs | CS  | -0.636*** | -0.665*** | -0.736*** |
| L      | vs | TGW | 0.405***  | 0.644***  | 0.041     |
| W      | vs | LWR | -0.670*** | -0.430*** | -0.537*** |
| W      | vs | CS  | 0.649***  | 0.436***  | 0.520***  |
| W      | vs | TGW | 0.592***  | 0.734***  | 0.123     |
| LWR    | vs | CS  | -0.976*** | -0.949*** | -0.970*** |
| LWR    | vs | TGW | -0.154    | 0.067     | -0.047    |
| CS     | vs | TGW | 0.150     | -0.064    | 0.059     |

\*  $p < .05$ , \*\*  $p < .01$ , \*\*\*  $p < .001$  AS: Area size, PL: Perimeter length, L: Grain length, W: Grain width, LWR: Length-width ratio, CS: Circularity, TGW: Thousand grain weight
